# Supplementary material for: Stimulus-dependent recruitment of lateral inhibition underlies retinal direction selectivity
Source: eLife journal article supplement (doi:10.7554/elife.21053), 2016-12-08
Supplement: supp [file elife_poa_e21053_Figure_2_figure_supplement_1.pdf › elife_poa_e21053_Figure_2_figure_supplement_1.pdf]

Figure 2 - figure supplement 1

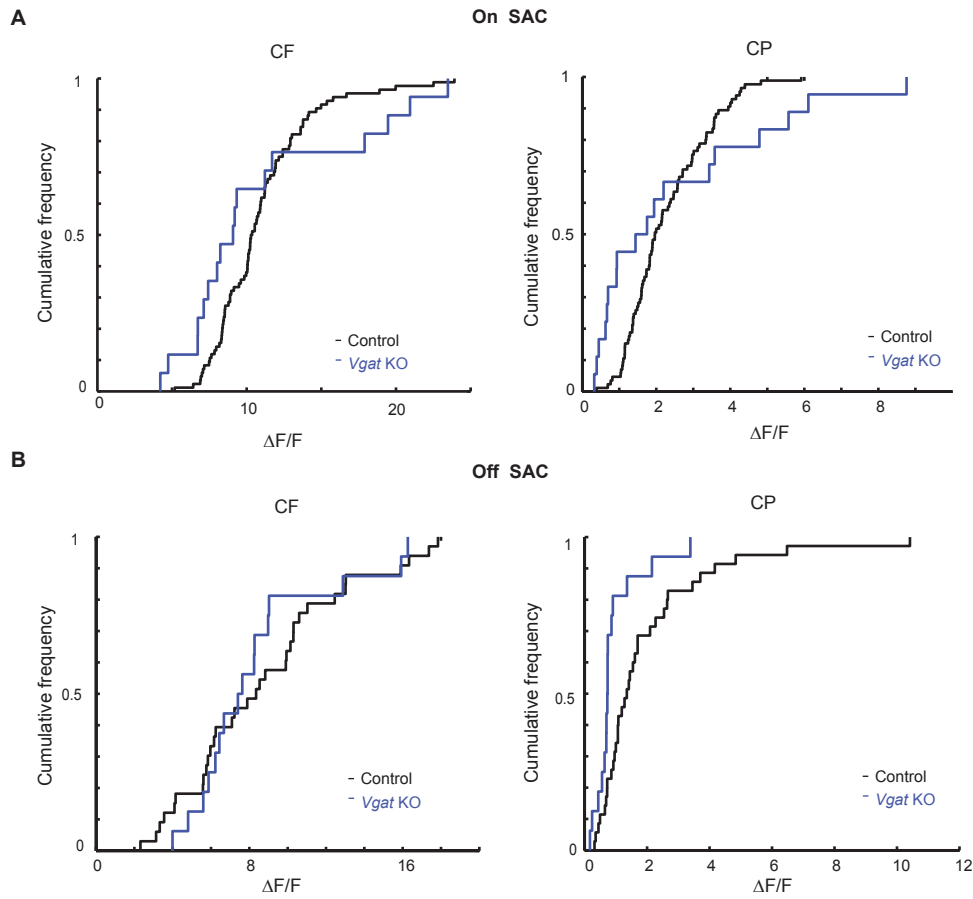

**Figure 2 - figure supplement 1. Centripetal response of Off SAC dendrites is selectively reduced in *Vgat* KO mice.**

**A.** Cumulative probability distributions of peak fluorescence in dendritic varicosities of On SACs during CF (left) and CP (right) motion in control and *Vgat* KO mice. Mean  $\pm$  SEM: On-CP: Control  $199 \pm 15$  %, KO  $247 \pm 57$  %,  $p = 0.02$ ; On-CF: Control  $1021 \pm 67$  %, KO  $1091 \pm 142$  %,  $p = 0.13$ .

**B.** As in **A**, cumulative probability distributions of peak fluorescence in dendritic varicosities of Off SACs. Mean  $\pm$  SEM: Off-CP: Control  $198 \pm 33$  %, KO  $94 \pm 20$  %,  $*p = 0.001$ ; Off-CF: Control  $1042 \pm 137$  %, KO  $868 \pm 91$  %,  $p = 0.35$ .
