# Supplementary material for: Stimulus-dependent recruitment of lateral inhibition underlies retinal direction selectivity
Source: eLife journal article supplement (doi:10.7554/elife.21053), 2016-12-08
Supplement: supp [file elife_poa_e21053_Figure_4_figure_supplement_1.pdf › elife_poa_e21053_Figure_4_figure_supplement_1.pdf]

Figure 4 - figure supplement 1

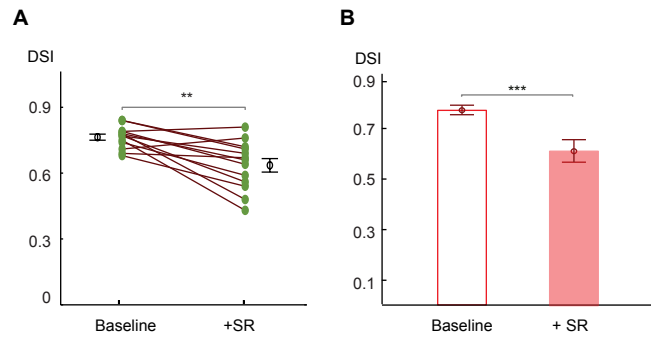

**Figure 4 - figure supplement 1. Centrifugal preference of On SACs is impaired in *Gabra2* KO mice in the presence of SR95531.**

**A.** Pairwise comparison of DSI values of individual On SACs before and after adding SR95531 in *Gabra2* KO mice. Paired t-test \*\*  $p < 0.005$

**B.** Summary bar graph of DSI values. Error bars represent standard error of the mean (SEM). Unpaired t-test \*\*\*  $p < 0.0005$

Baseline:  $0.76 \pm 0.01$ ; + SR:  $0.63 \pm 0.03$ ;  $n = 13$  cells, 3 mice.
